# Supplementary material
Source: PubMed Central journal article supplement (PMC3567823)
Supplement: cr2012146x1.pdf [file cr2012146x1.pdf]

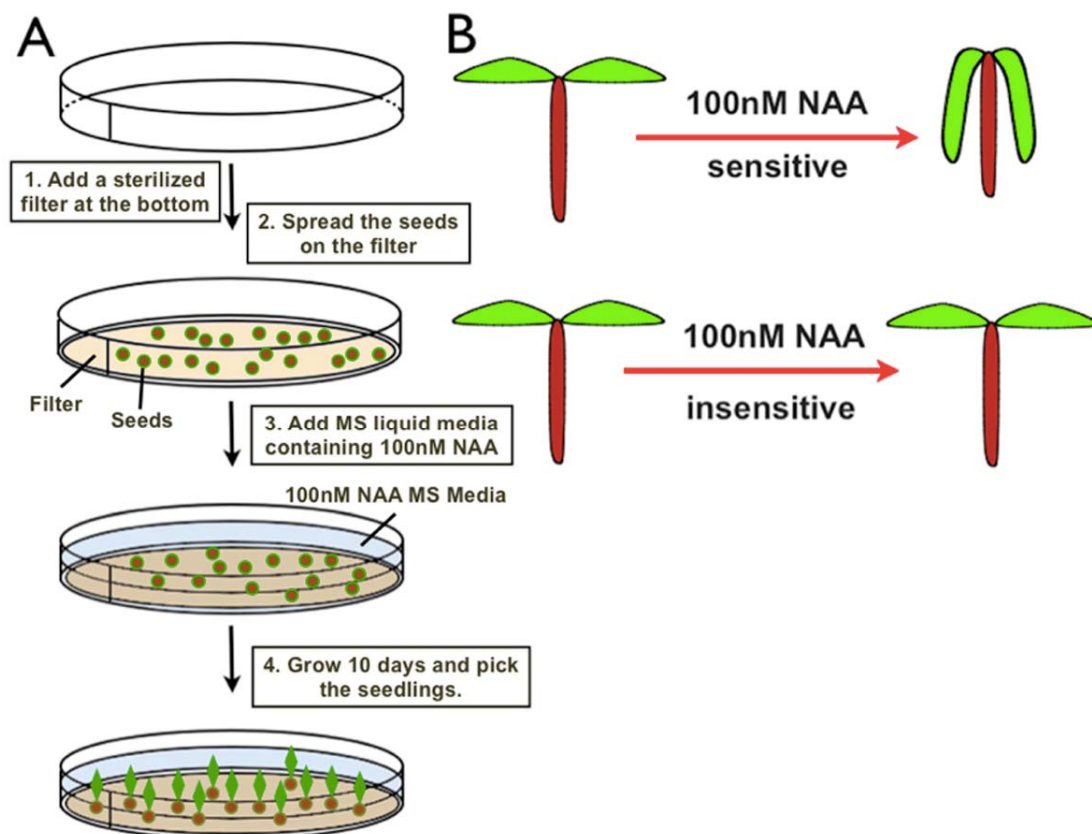

**Supplemental information, Figure S1** Auxin insensitive mutant (AIM) screen method.

(A) Procedure of AIM screening. Details are described in methods.

(B) In wild type plants, cotyledon will show down-curved phenotype after auxin treatment; in mutant, cotyledon will keep flat after auxin treatment. Mutant samples from screening are picked out after auxin treatment, auxin sensitive ones have strong down-curved cotyledon, auxin insensitive ones have relatively flat cotyledon.
