# Supplementary material
Source: PubMed Central journal article supplement (PMC3567823)
Supplement: cr2012146x2.pdf [file cr2012146x2.pdf]

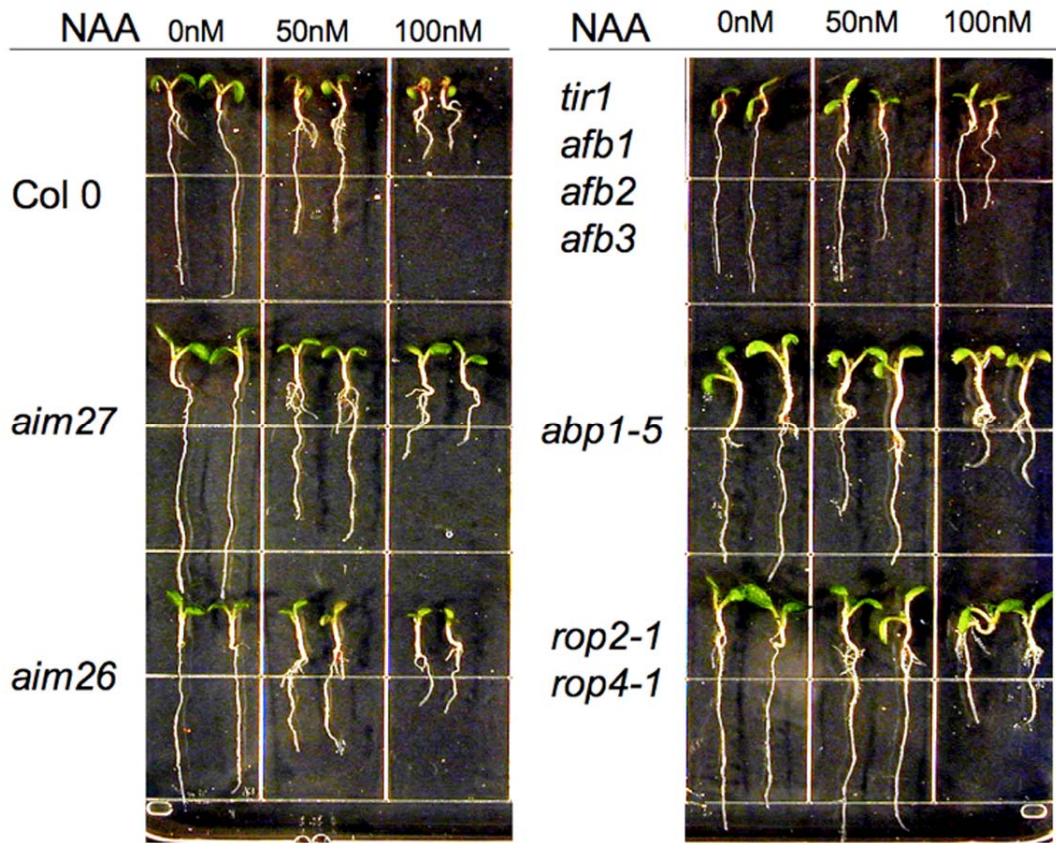

**Supplemental information, Figure S2** Auxin response of AIM mutants compared to *tir* quadruple, *abp1-5*, and *rop2 rop4* mutants.

Left: auxin response in AIM mutants, the cotyledon will not curve after auxin treatment, but the root is inhibited by auxin as in wild type. After cloning, *aim27* turns out to be *ARR7OX*, and *aim26* is *ahp5*.

Right: auxin response in *tir quadruple*, *abp1-5* and *rop2-1 rop4-1* mutants. Both cotyledons and roots are less sensitive to auxin in these mutants.
