# Supplementary material
Source: PubMed Central journal article supplement (PMC3567823)
Supplement: cr2012146x3.pdf [file cr2012146x3.pdf]

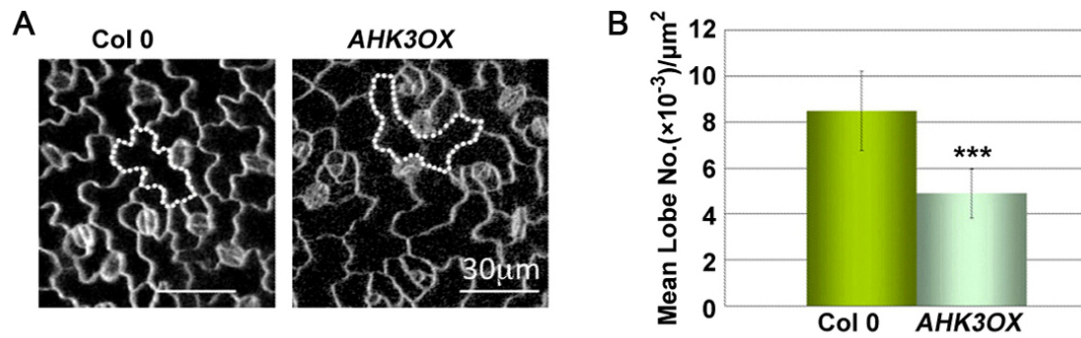

**Supplemental information, Figure S3** Cytokinin receptor regulates PC interdigitation.

(A) Overexpression of the cytokinin *AHK3* receptor gene decreased PC interdigitation in leaves. Representative image of PCs from the *AHK3 OX-1* 3rd true leaf is comparing with Col 0. Bars =30 $\mu\text{m}$ .

(B) Quantitative analysis of lobe number per area (mean  $\pm$  SEM) in the *AHK3* overexpression line from (A). Asterisks indicate significant difference from wild type PCs ( $p < 0.001$ , t test).
