# Supplementary material
Source: PubMed Central journal article supplement (PMC3567823)
Supplement: cr2012146x5.pdf [file cr2012146x5.pdf]

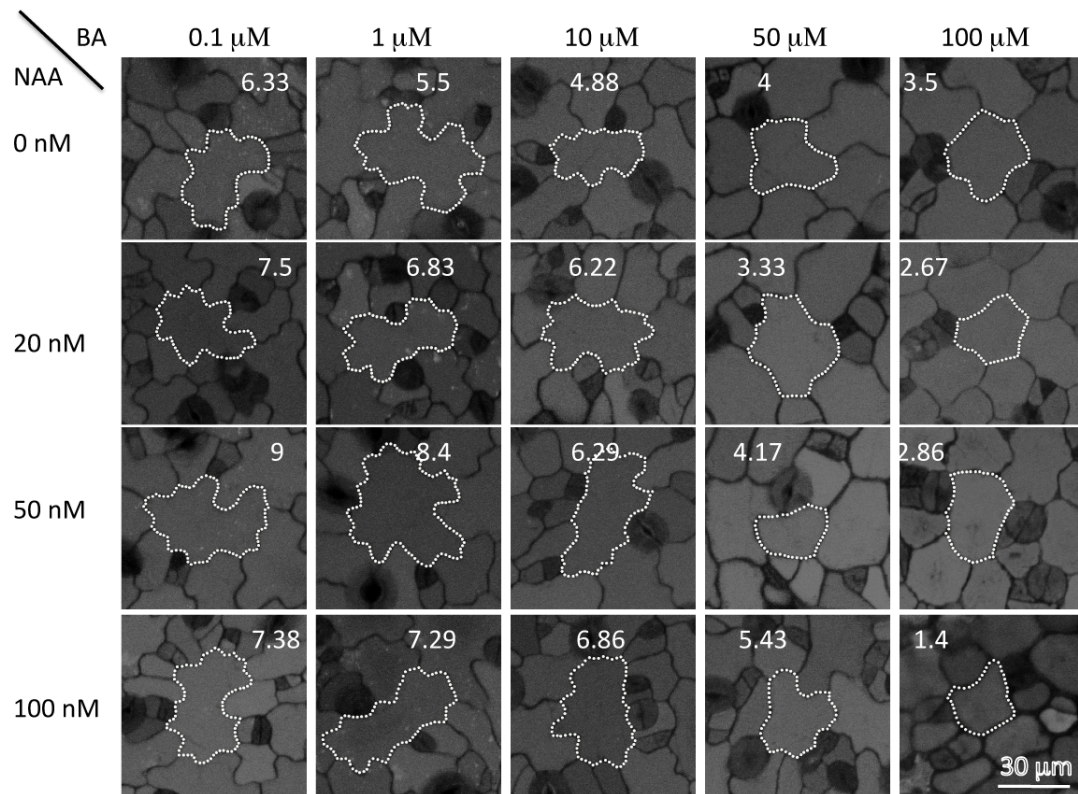

**Supplemental information, Figure S5** The PC shape varies under different combinations of NAA and BA treatment.

The combinations of co-treatment with auxin and cytokinin lead to the change of average lobe numbers per area in PC. The white numbers represent the average lobe numbers per area. The results showed that increasing concentration of NAA could rescue PC interdigitation defects induced by cytokinin. The 3 DAG seedlings have been observed.
