# Supplementary material
Source: PubMed Central journal article supplement (PMC3567823)
Supplement: cr2012146x6.pdf [file cr2012146x6.pdf]

**Supplemental information, Table S1** Sequences of primers for genotyping type A and type B ARR.

| Name              | Primer                          |
|-------------------|---------------------------------|
| <i>arr1-2_LP</i>  | GAGCAGCAGAGTGTTACCGAC           |
| <i>arr1-2_RP</i>  | TTGCTTTGATTTACGTTGTG            |
| <i>arr2-1_LP</i>  | TTATTAAATGCCAGTGGCAGC           |
| <i>arr2-1_RP</i>  | CGACAAGAAGCTCGAAGATTCTG         |
| <i>arr3-1_LP</i>  | ACATGGTCATGGTTTAGCGAC           |
| <i>arr3-1_RP</i>  | TTTTTGATTCCGATTTTGGTG           |
| <i>arr4-1_LP</i>  | TTTATGTGCGACACGTTGATGACTACTTT   |
| <i>arr4-1_RP</i>  | GGAGGCGCGAGAGATTAAGGGACATCTAT   |
| <i>arr5-1_LP</i>  | TCTCTCTGTGGTACATTTCTTGAAAAATGGG |
| <i>arr5-1_RP</i>  | CTTGGGGAAATTTCTAAGAAAAGCCATGTA  |
| <i>arr6-1_LP</i>  | AAATCTTGCATCCCATTCCA            |
| <i>arr6-1_RP</i>  | TCCTGAAGCACAAATCACGA            |
| <i>arr7-1_LP</i>  | TCATATCCTGAAAGTCCTGGC           |
| <i>arr7-1_RP</i>  | TAATTGAGCAATAACCACCGG           |
| <i>arr9-1_LP</i>  | GGATCCCAGACTCTTTATTTCTCTTCCTC   |
| <i>arr9-1_RP</i>  | CCCACATACAACATCATCATATTCC       |
| <i>arr10-1_LP</i> | TATCGGCATTAGCCATTATTGGTCGTTAC   |
| <i>arr10-1_RP</i> | ATGCGGTCTGTGCCTGATTCGTTGTTGTA   |
| <i>arr11-1_LP</i> | GCTAAATTATTGGAAGAATATGGG        |
| <i>arr11-1_RP</i> | TTCACCACCTCCAAGAAAATG           |
| <i>arr12-1_LP</i> | CGGTACAATATGCGGATTTTGATTCGGTAT  |
| <i>arr12-1_RP</i> | TAATAGCTTGCTGATTAGCCACACCACTGA  |
| <i>arr13-1_LP</i> | TGTGATGATCAAGGATGGAAC           |
| <i>arr13-1_RP</i> | TCAATCAAACATCGTTTCAATGTC        |
| <i>arr14-1_LP</i> | CACAAGCTCCATGGTTGATTC           |
| <i>arr14-1_RP</i> | TATCTCCAACATCGCCATTTT           |
| <i>arr15-1_TP</i> | ATATTGACCATCATACTCATTGC         |
| <i>arr15-1_LP</i> | AAACCAAACAAAAGAAAAGCAGAA        |
| <i>arr15-1_RP</i> | TGTGAACTTTCAATTGATTCACC         |
| <i>arr16-1_LP</i> | AGACCTTTCTTGCTGCACAAG           |
| <i>arr16-1_RP</i> | ATTGGAGTATTTGGGTTTGGG           |
| LBb1              | GCGTGGACCGCTTGCTGCAACT          |
| LBa1              | TGGTTCACGTAGTGGGCCATCG          |
| LBb1_3            | ATTTTGCCGATTTTCGGAAC            |
